# Supplementary material for: Skin Damages—Structure Activity Relationship of Benzimidazole Derivatives Bearing a 5-Membered Ring System
Source: PubMed Central journal article supplement (PMC7570844; doi:10.3390/molecules25184324), 2020-09-21
Supplement: molecules-25-04324-s001.pdf [file molecules-25-04324-s001.pdf]

# Skin damages: Structure Activity Relationship of benzimidazole derivatives bearing a 5-membered ring system

Ernestine Nicaise Djuidje <sup>1</sup>, Elisa Durini <sup>1</sup>, Sabrina Sciabica <sup>2</sup>, Elena Serra <sup>3</sup>, Jan Balzarini<sup>4</sup>, Sandra Liekens <sup>4</sup>, Stefano Manfredini <sup>1</sup>, Silvia Vertuani <sup>1</sup>, and Anna Baldisserotto <sup>1,\*</sup>

Table S1. The three classes of benzimidazole derivatives.

|                |                                                                                          |                                                                                           |                                                                                            |
|----------------|------------------------------------------------------------------------------------------|-------------------------------------------------------------------------------------------|--------------------------------------------------------------------------------------------|
| <b>Class A</b> | 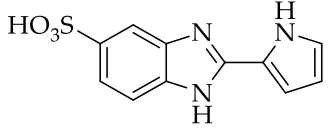<br>7   | <br>10   | <br>13   |
| <b>Class B</b> | <br>8  | <br>11  | <br>14  |
| <b>Class C</b> | <br>9 | <br>12 | <br>15 |

Table S2. UV filtering activity of benzimidazole derivatives 7-15 in solution.

| Compound | SPF        | UVAPF     | UVA/UVB | $\lambda_c$ (nm) |
|----------|------------|-----------|---------|------------------|
| PBSA     | 3.40±0.17  | 1.03±0.08 | 0.29    | 322              |
| 7        | 5.43±0.39  | 1.22±0.03 | 0.2     | 345              |
| 10       | 13.13±0.70 | 1.16±0.05 | 0.02    | 325              |
| 13       | 7.40±0.23  | 1.10±0.09 | 0.7     | 345              |
| 8        | 10.96±0.54 | 1.33±0.05 | 0.29    | 342              |
| 11       | 20.06±3.04 | 1.05±0.06 | 0.3     | 333              |
| 14       | 16.66±1.21 | 1.20±0.10 | 0.5     | 332              |
| 9        | 4.72±0.17  | 1.43±0.09 | 0.48    | 339              |
| 12       | 7.03±0.42  | 1.49±0.07 | 0.37    | 345              |
| 15       | 6.40±0.12  | 1.42±0.11 | 0.43    | 342              |

**Table S3.** Percent growth inhibition of dermatophytes treated with benzimidazole derivatives at 100 µg/mL. Each value is the mean of three measurements.

| Compound (100 µg/mL) | Percent growth inhibition |                 |                          |                     |                     |
|----------------------|---------------------------|-----------------|--------------------------|---------------------|---------------------|
|                      | <i>M. gypseum</i>         | <i>M. canis</i> | <i>T. mentagrophytes</i> | <i>T. tonsurans</i> | <i>E. floccosum</i> |
| PBSA                 | 9.62 ± 0.61               | +               | +                        | +                   | 7.41 ± 0.43         |
| 7                    | 73.04 ± 3.67              | 72.11 ± 7.51    | 69.03 ± 1.84             | 56.58 ± 4.04        | 52.46 ± 6.58        |
| 10                   | 99.07 ± 1.33              | 96.85 ± 3.56    | 96.26 ± 2.42             | 96.97 ± 0.62        | 101.75 ± 4.92       |
| 13                   | 3.74 ± 1.49               | 8.66 ± 1.78     | +                        | 4.55 ± 1.34         | 21.05 ± 2.14        |
| 8                    | 8.00 ± 2.44               | +               | +                        | +                   | +                   |
| 11                   | 99.00 ± 0.28              | 98.32 ± 2.03    | 97.22 ± 4.53             | 94.74 ± 5.63        | 97.87 ± 4.23        |
| 14                   | +                         | 18.72 ± 0.59    | +                        | +                   | 6.45 ± 1.47         |
| 9                    | 59.80 ± 6.12              | 65.91 ± 3.21    | 57.27 ± 1.09             | 50.75 ± 2.11        | 50.00 ± 3.26        |
| 12                   | 100.00 ± 1.63             | 92.91 ± 1.33    | 98.13 ± 2.76             | 96.97 ± 1.34        | 94.74 ± 5.45        |
| 15                   | 2.14 ± 0.59               | 20.30 ± 0.54    | +                        | 4.48 ± 0.90         | 6.45 ± 2.98         |

**Table S4.** Cytotoxicity and antiviral activity of compounds in human embryonic lung (HEL) cell cultures.

| Compound    | Cytotoxic concentration <sup>a</sup> (µM) | Antiviral EC <sub>50</sub> <sup>b</sup> (µM) |                        |                                    |                |               |                          |
|-------------|-------------------------------------------|----------------------------------------------|------------------------|------------------------------------|----------------|---------------|--------------------------|
|             |                                           | Herpes simplex virus-1 (KOS)                 | Herpes simplex virus-2 | Herpes simplex virus-1 TK-KOS ACVr | Vaccinia virus | Adeno virus-2 | Human Coronavirus (229E) |
| 7           | >100                                      | >100                                         | >100                   | >100                               | >100           | >100          | >100                     |
| 10          | >100                                      | >100                                         | >100                   | >100                               | >100           | >100          | >100                     |
| 13          | >100                                      | >100                                         | >100                   | >100                               | >100           | >100          | >100                     |
| 8           | >100                                      | >100                                         | >100                   | >100                               | >100           | >100          | >100                     |
| 11          | >100                                      | >100                                         | >100                   | >100                               | >100           | >100          | >100                     |
| 14          | >100                                      | >100                                         | >100                   | >100                               | >100           | >100          | >100                     |
| 9           | >100                                      | >100                                         | >100                   | >100                               | >100           | >100          | >100                     |
| 12          | >100                                      | >100                                         | >100                   | >100                               | >100           | >100          | >100                     |
| 15          | >100                                      | >100                                         | >100                   | >100                               | >100           | >100          | >100                     |
| Birivudin   | >250                                      | 0.01                                         | 250                    | 0.1                                | 5.8            | -             | -                        |
| Cidofovir   | >250                                      | 4.5                                          | 3.4                    | 2.8                                | 50             | 10            | -                        |
| Acyclovir   | >250                                      | 0.6                                          | 0.6                    | 2                                  | >250           | -             | -                        |
| Ganciclovir | >250                                      | 0.01                                         | 0.01                   | 0.2                                | >100           | -             | -                        |

<sup>a</sup> Cytotoxic concentration, as determined by measuring the cell viability with the colorimetric formazan-based MTS assay. <sup>b</sup> concentration producing 50% inhibition of virus-induced cytopathic effect, as determined by MTS method. – not detected.

**Table S5.** Cytotoxicity and antiviral activity of compounds in HeLa cell cultures.

| Compound  | Cytotoxic concentration <sup>a</sup><br>( $\mu\text{M}$ ) | Antiviral EC <sub>50</sub> <sup>b</sup> ( $\mu\text{M}$ ) |                    |                             |
|-----------|-----------------------------------------------------------|-----------------------------------------------------------|--------------------|-----------------------------|
|           |                                                           | Vesicular stomatitis virus                                | Coxsackie virus B4 | Respiratory syncytial virus |
| 7         | >100                                                      | >100                                                      | >100               | >100                        |
| 10        | >100                                                      | >100                                                      | >100               | >100                        |
| 13        | >100                                                      | >100                                                      | >100               | >100                        |
| 8         | >100                                                      | >100                                                      | >100               | >100                        |
| 11        | >100                                                      | >100                                                      | >100               | >100                        |
| 14        | >100                                                      | >100                                                      | >100               | >100                        |
| 9         | >100                                                      | >100                                                      | >100               | >100                        |
| 12        | >100                                                      | >100                                                      | >100               | >100                        |
| 15        | >100                                                      | >100                                                      | >100               | >100                        |
| DS-10.000 | >100                                                      | >100                                                      | >100               | 0.8                         |
| Ribaravin | >250                                                      | 112                                                       | 250                | 10                          |

<sup>a</sup> Cytotoxic concentration, as determined by measuring the cell viability with the colorimetric formazan-based MTS assay. <sup>b</sup> concentration producing 50% inhibition of virus-induced cytopathic effect, as determined by MTS method.

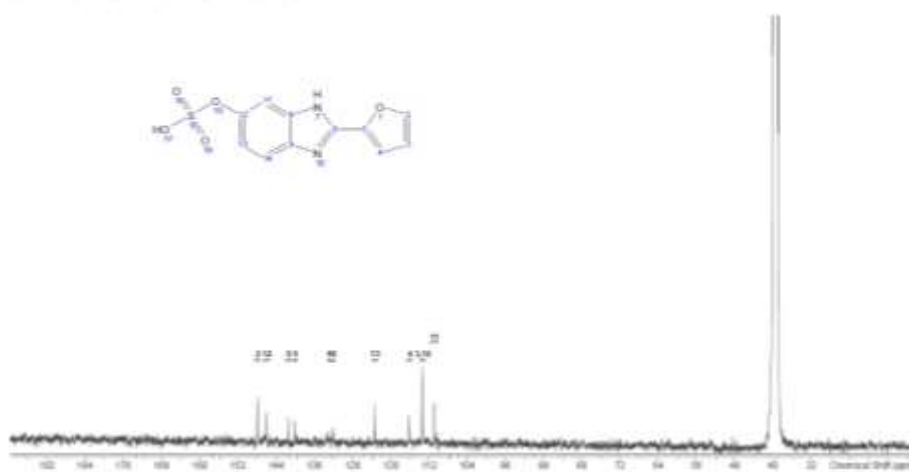

**Figure S1.** Representative <sup>13</sup>C-NMR spectrum of newly synthesized compound 8.

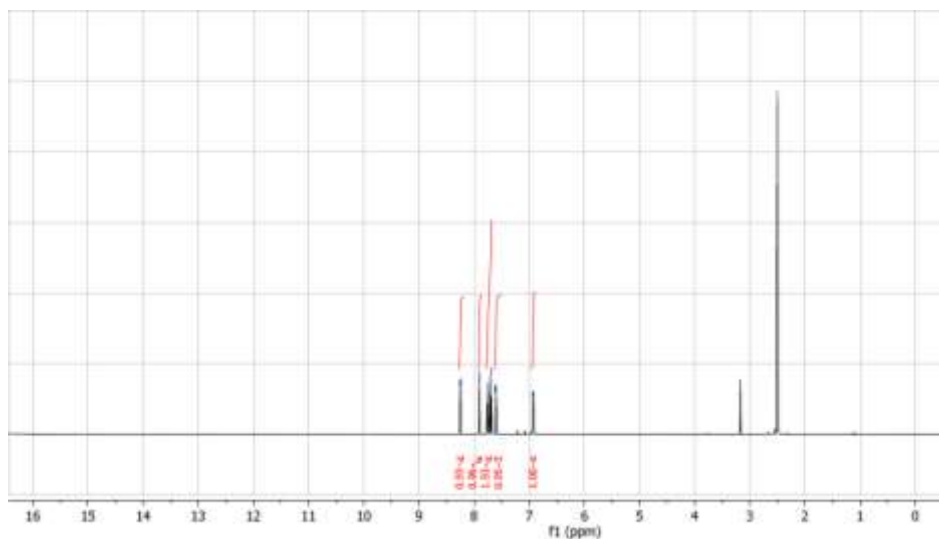

**Figure S2.** Representative <sup>1</sup>H-NMR spectrum of newly synthesized compound 8.

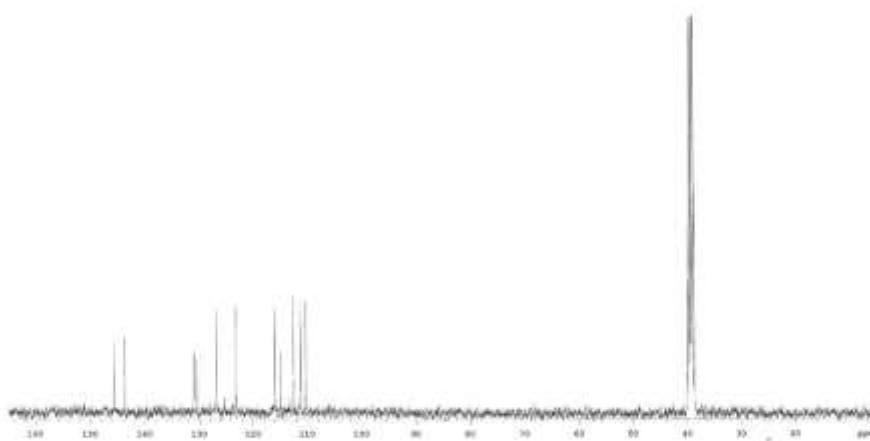

**Figure S3.** Representative <sup>13</sup>C-NMR spectrum of newly synthesized compound 7.

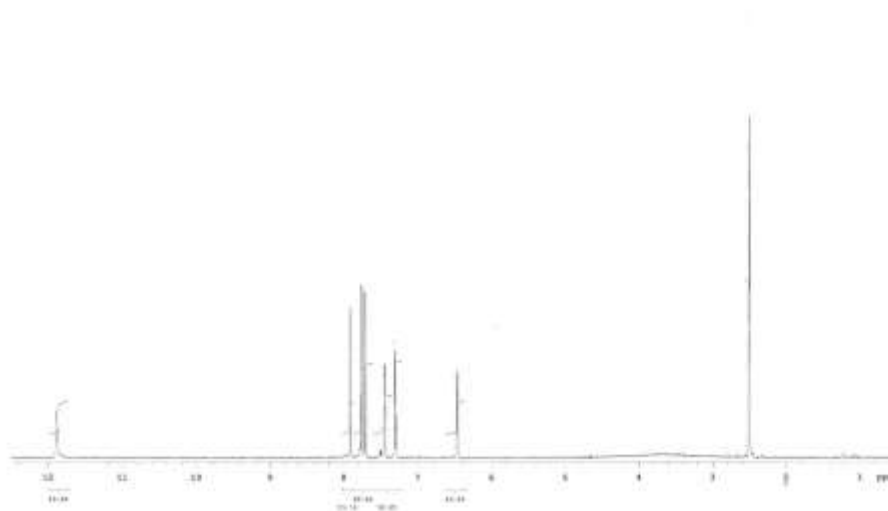

**Figure S42.** Representative  $^1\text{H-NMR}$  spectrum of newly synthesized compound **7**.

Following the general procedure benzimidazoles **9** [CAS number 1158706-59-2], **10** [1S], **11** [1S], **12** [2S, 3S], **13** [CAS Registry Number 1030658-13-9], **14** [4S], and **15** [CAS Registry Number 1158380-17-6, 5S] were prepared and their analytical and spectral data are in agreement with those reported in literature or those reported as commercial sources.

#### References:

1S. Senapak, W.; Saeeng, R.; Jaratjaroonphong, J.; Promarak, V.; Sirion, U. Metal-free selective synthesis of 2-substituted benzimidazoles catalyzed by Bronsted acidic ionic liquid: Convenient access to one-pot synthesis of N-alkylated 1,2-disubstituted benzimidazoles. *Tetrahedron* **2019**, *75*, 3543-3552.

2S. Das, K.; Mondal, A.; Srimani, D. Selective Synthesis of 2-Substituted and 1,2-Disubstituted Benzimidazoles Directly from Aromatic Diamines and Alcohols Catalyzed by Molecularly Defined Nonphosphine Manganese(I) Complex. *J. Org. Chem.* **2018**, *83*, 9553-9560.

3S. Shi X.; Guo, J.; Liu, J.; Ye, M.; Xu, Q. Unexpectedly Simple Synthesis of Benzazoles by tBuONa- Catalyzed Direct Aerobic Oxidative Cyclocondensation of o-Thio/ Hydroxy/Aminoanilines with Alcohols under Air. *Chem. Eur. J.* **2015**, *21*, 9988 - 9993.

4S. Dhanamjayulu, P.; Boga, R.; B., Mehta, A. Inhibition of aflatoxin B1 biosynthesis and down regulation of aflR and aflB genes in presence of benzimidazole derivatives without impairing the growth of *Aspergillus flavus*. *Toxicon* **2019**, *170*, 60-67.

5S. Moszczynski-Petkowski, R.; Majer, J.; Borkowska, M.; Bojarski, Ł.; Janowska, S.; Matłoka, M.; Stefaniak, F.; Smuga, D.; Bazydło, K.; Dubiel, K.; Wieczorek, M. Synthesis and characterization of novel classes of PDE10A inhibitors - 1H-1,3-benzodiazoles and imidazo[1,2-a]pyrimidines. *E. J. Med. Chem.* **2018**, *155*, 96-116.
